# Supplementary material for: Kinetics of Phenolic Compounds Modification during Maize Flour Fermentation
Source: MDPI journal article supplement (doi:10.3390/molecules26216702), 2021-11-05
Supplement: s1 [file s1]

Article

# Kinetics of Phenolic Compounds Modification During Maize Flour Fermentation-Supplementary Figures

Oluwafemi Ayodeji Adebo <sup>1,\*</sup>, Ajibola Bamikole Oyedele <sup>1,\*</sup>, Janet Adeyinka Adebisi <sup>1</sup>, Chiemela Enyinnaya Chinma <sup>2,3</sup>, Samson Adeoye Oyeyinka <sup>1</sup>, Oladipupo Odunayo Olatunde <sup>4</sup>, Ezekiel Green <sup>1</sup>, Patrick Berka Njobeh <sup>1</sup> and Kulsum Kondiah <sup>1,\*</sup>

<sup>1</sup> Department of Biotechnology and Food Technology, Faculty of Science, University of Johannesburg (Doornfontein Campus), P. O. Box 17011, Doornfontein 2028, Johannesburg, South Africa; janetaadex@gmail.com (J.A.A.); sartf2001@yahoo.com (S.A.O.); egreen@uj.ac.za (E.G.); pnjobeh@uj.ac.za (P.B.N.)

<sup>2</sup> Department of Food Science and Technology, Federal University of Technology Minna, Nigeria; chinmachiemela@futminna.edu.ng

<sup>3</sup> Africa Center of Excellence for Mycotoxin and Food Safety, Federal University of Technology Minna, Nigeria

<sup>4</sup> Department of Food and Human Nutritional Sciences, Faculty of Agricultural and Food Sciences, University of Manitoba, Winnipeg, MB, R3T 2N2, Canada; oladipupo.olatunde177@gmail.com

\* Correspondence: oadebo@uj.ac.za (O.A.A.); jibanky2@gmail.com (A.B.O.); kulsumk@uj.ac.za (K.K.); Tel.: +27115596261 (O.A.A.); Tel.: +27744113712 (A.B.O.); Tel.: +27115596915 (K.K.)

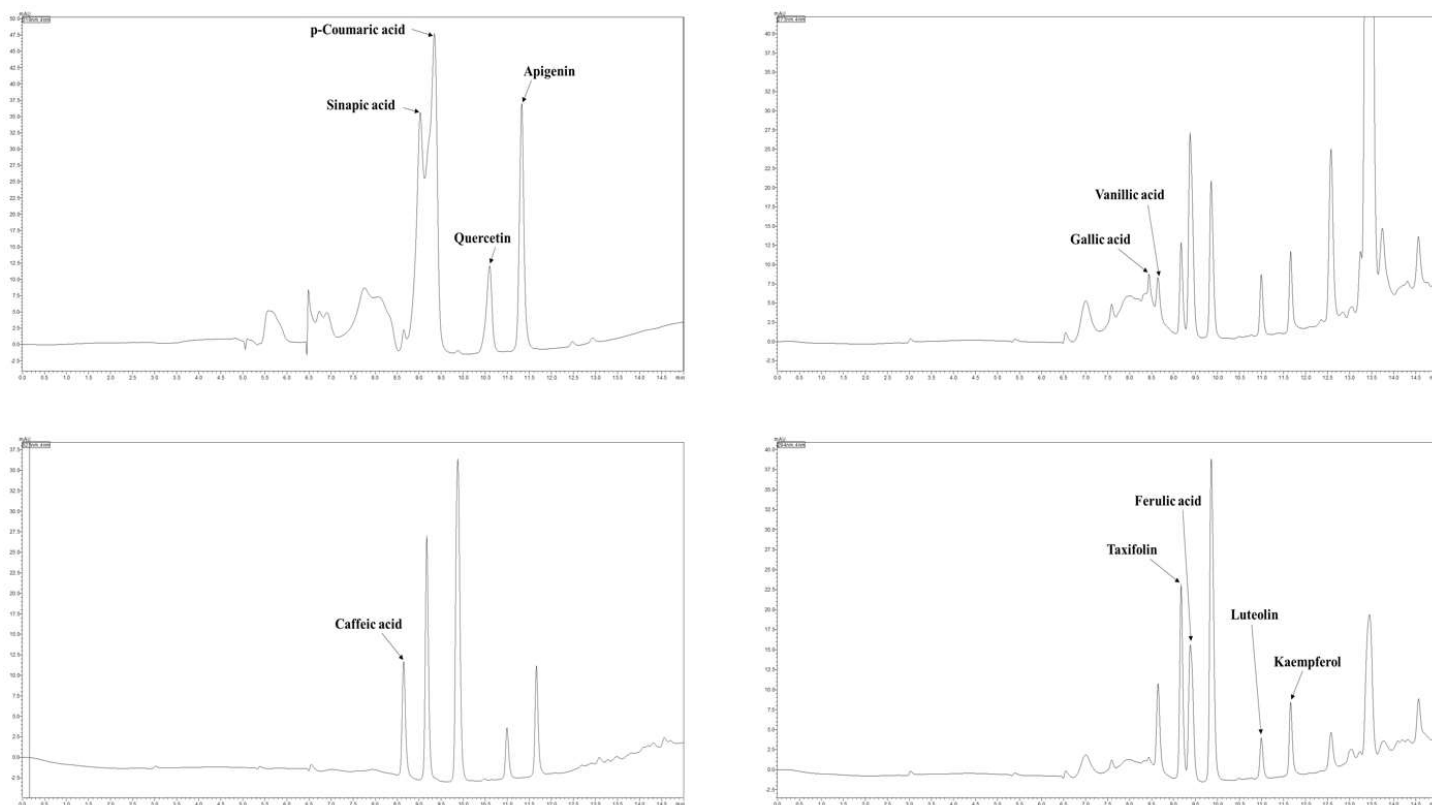

**Supplementary Figure S1.** An example of chromatographic separation of analytes in the sample (with peaks of each phenolic compound).

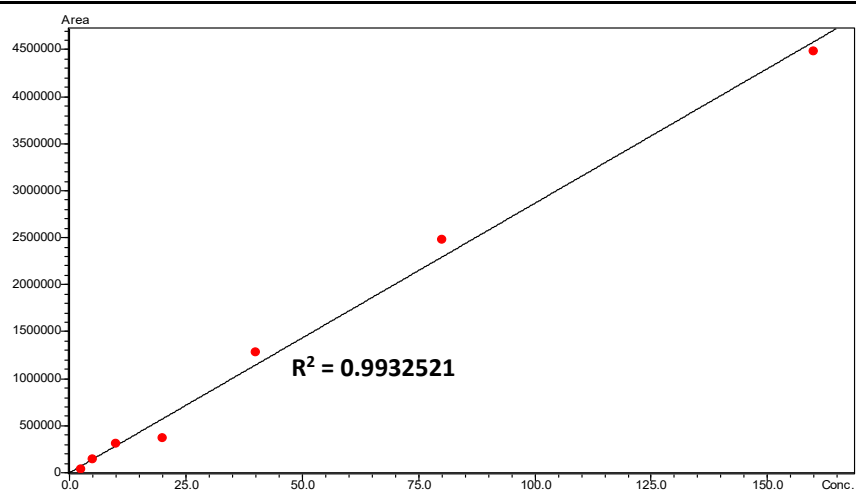

A

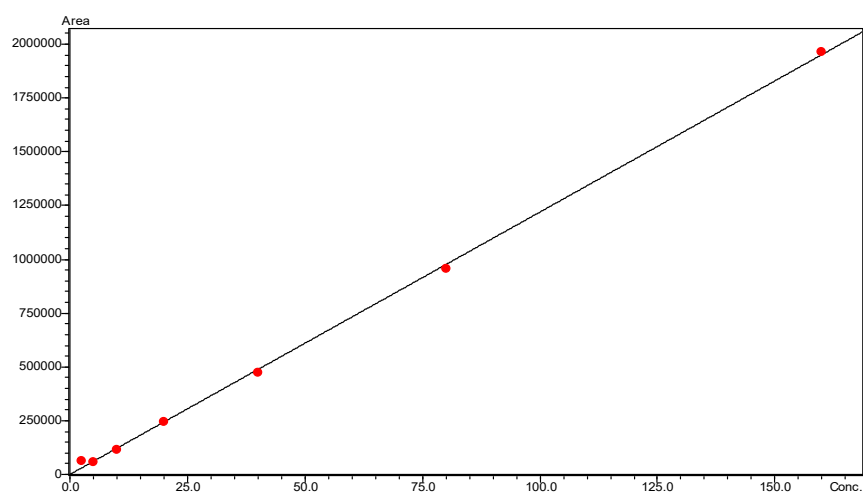

B

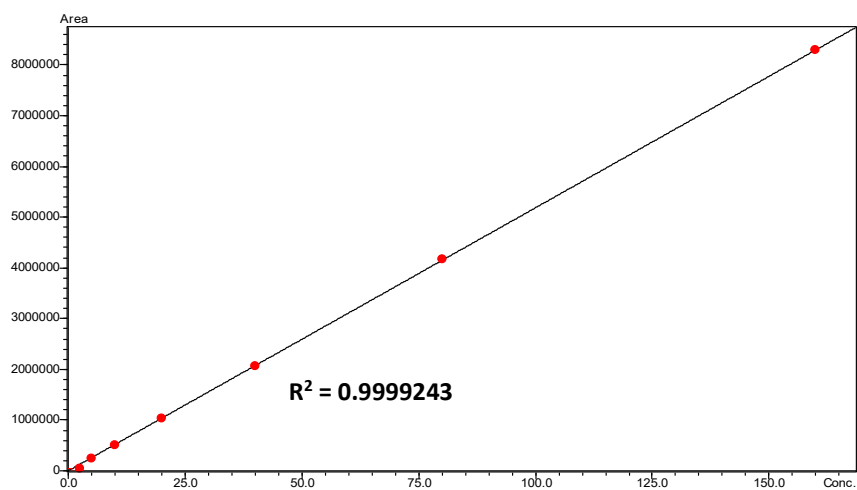

C

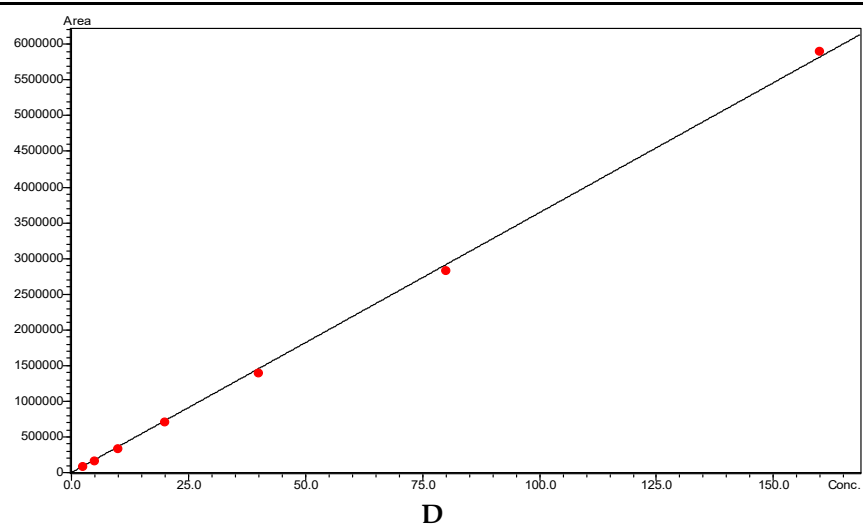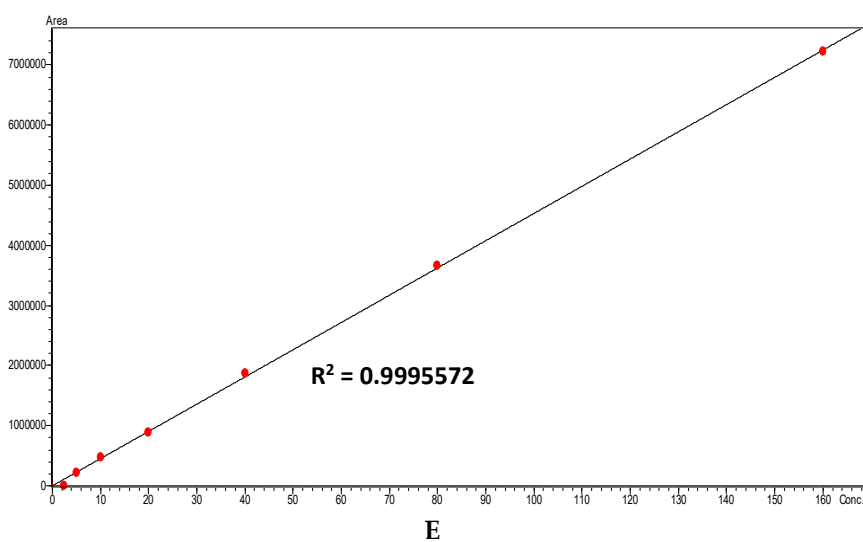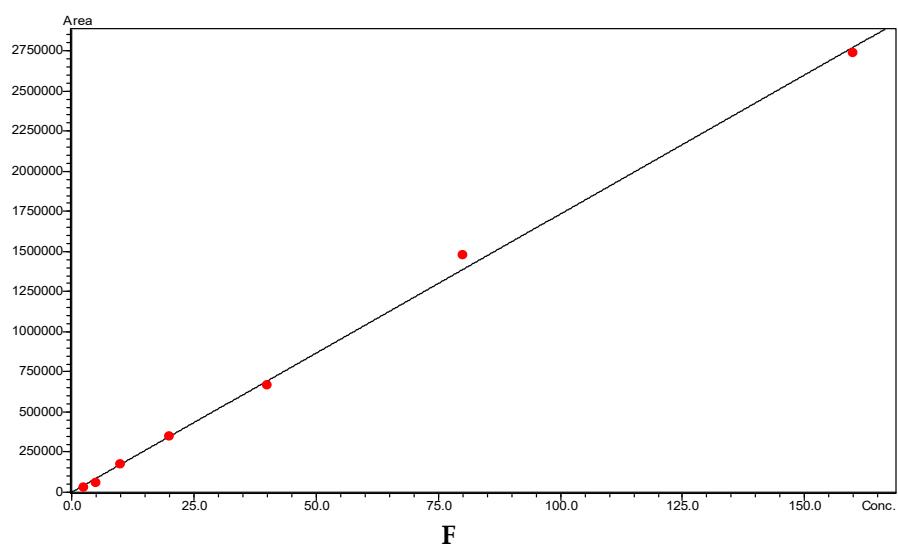

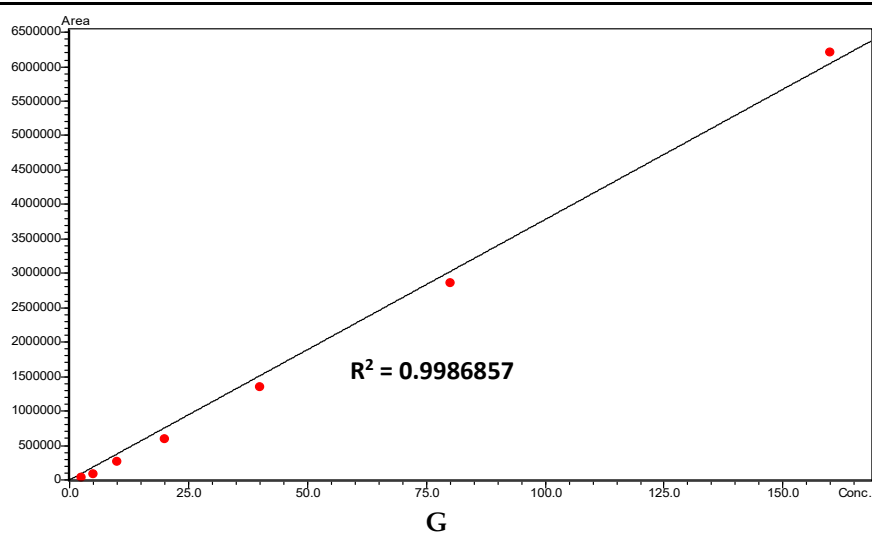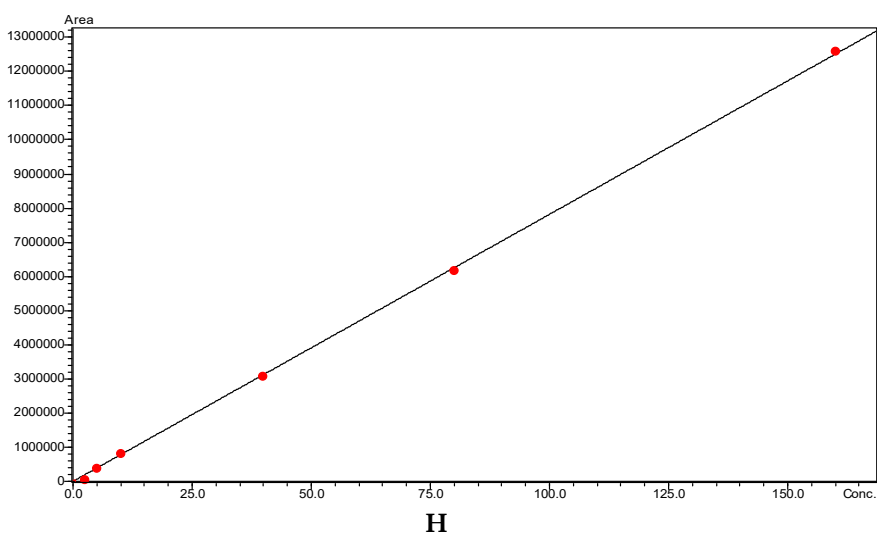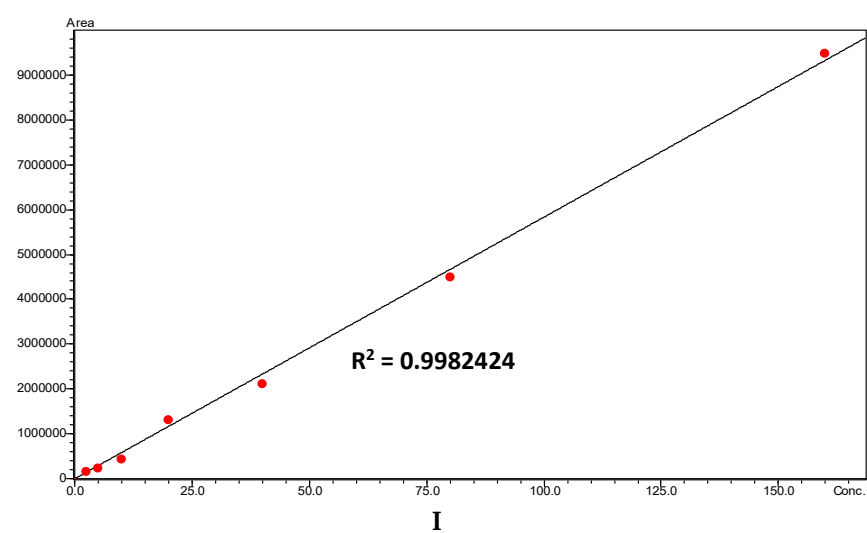

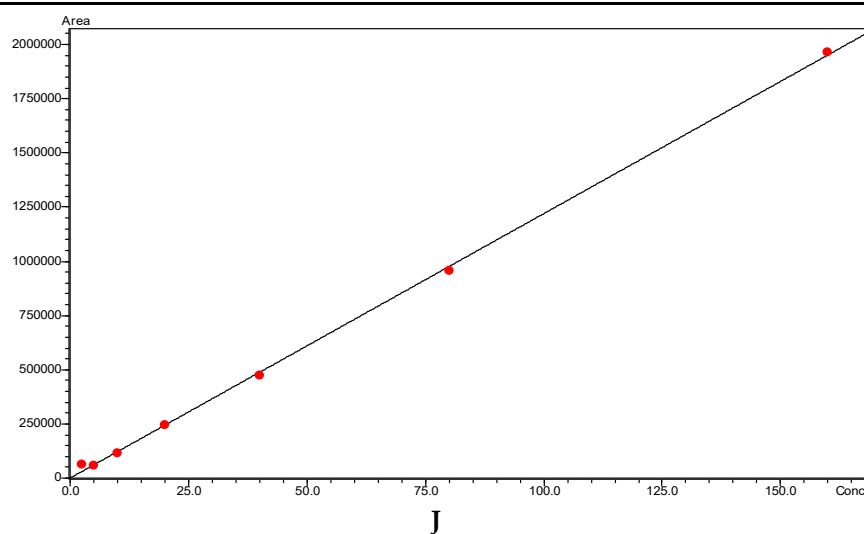

**Supplementary Figure S2.** Standard calibration curves and  $R^2$  values for (A) apigenin, (B) kaempferol, (C) luteolin, (D) quercetin, (E) taxifolin, (F) caffeic acid, (G) ferulic acid, (G) gallic acid, (H) p-coumaric acid, (I) sinapic acid and (J) vanillic acid.
